# Supplementary material
Source: PubMed Central journal article supplement (PMC5824197)
Supplement: jamaoncol-3-28-s002.pdf [file jamaoncol-3-28-s002.pdf]

## Supplementary Online Content

Liu S, Chen B, Burugu S, et al. Role of cytotoxic tumor-infiltrating lymphocytes in predicting outcomes in metastatic HER2-positive breast cancer: a secondary analysis of a randomized clinical trial. *JAMA Oncol*. Published online July 27, 2017. doi:10.1001/jamaoncol.2017.2085

**eFigure 1.** REMARK Diagram of the Original CCTG MA.31 Trial and Biomarker Study Sets

**eFigure 2.** Distribution of TIL Counts Across the CCTG MA.31 H&E Slide Study Set

**eFigure 3.** Overall Survival Stratified by Treatment

**eFigure 4.** Model of Association of Immune Infiltrates in the Primary Tumor Biopsy (CD8+ sTIL) With the CCTG MA.31 Metastatic *HER2*-Positive Population

**eTable 1.** Patient Characteristics in the CCTG MA.31 Immune Biomarker Study Population

**eTable 2.** Biomarker Expression in the CCTG MA.31 Study Population, Stratified by Disease Status

**eTable 3.** Estimates of Prognostic Hazard Ratio (HR) for High vs Low Level Immune Infiltrates in the CCTG MA.31 IHC Immune Biomarker Study Population

**eTable 4.** Exploratory Additional Stratified Full Multivariate Analysis for PFS

This supplementary material has been provided by the authors to give readers additional information about their work.

**eFigure 1.** REMARK Diagram of the Original CCTG MA.31 Trial and Biomarker Study Sets

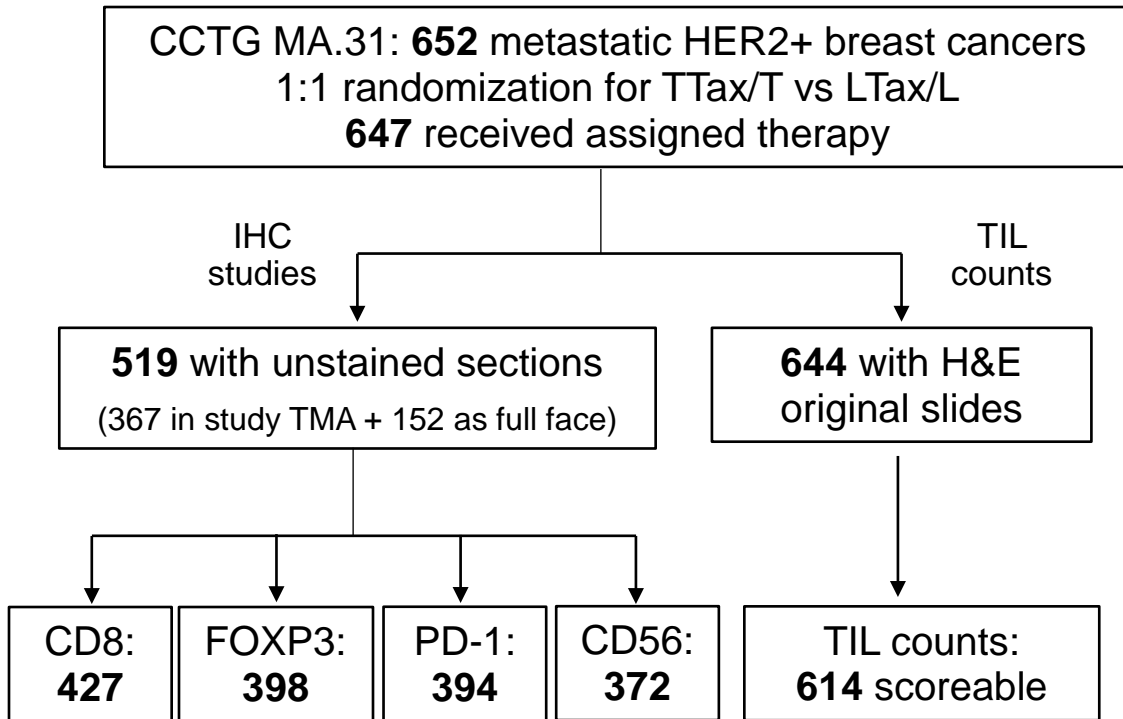

**eFigure 2.** Distribution of TIL Counts Across the CCTG MA.31 H&E Slide Study Set

Determined using the method of Denkert et al. (Mod Pathol 2016; 29:1155-64) based on percentage of intratumoral stromal area occupied by lymphocytes.

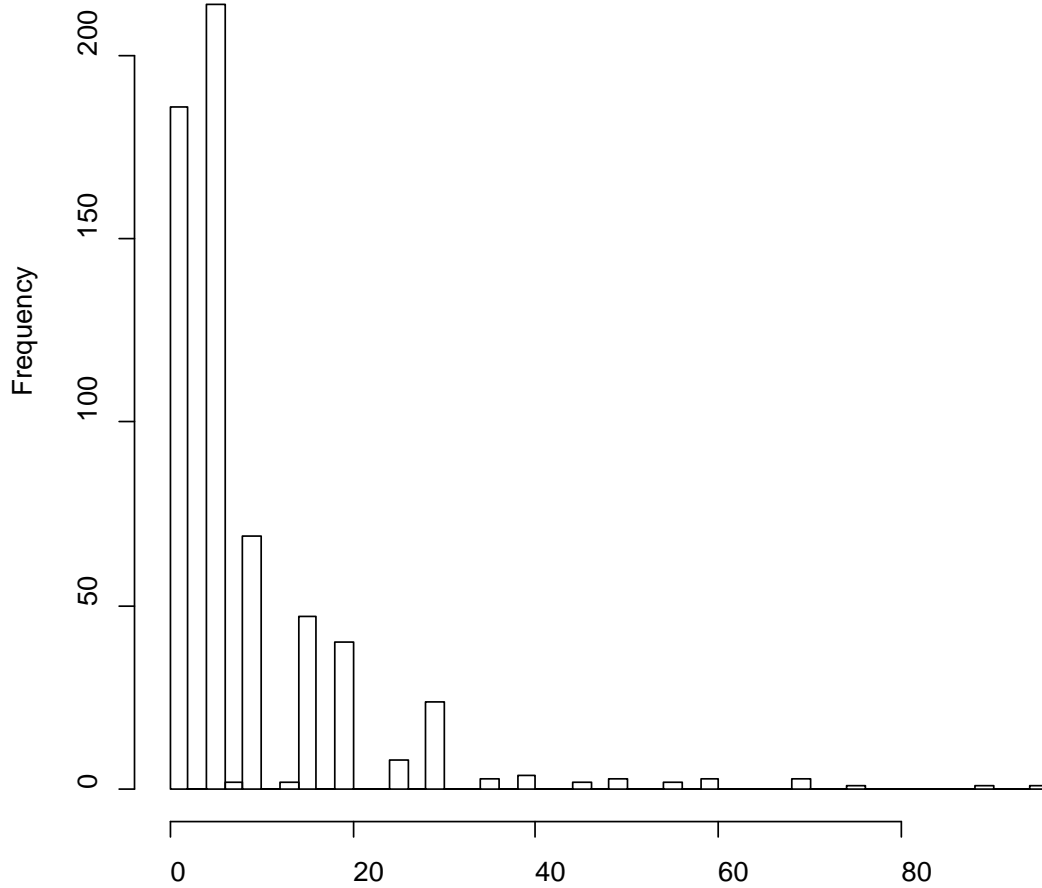

**eFigure 3. Overall Survival Stratified by Treatment**

TTax/T vs. LTax/L in CCTG MA.31 patients with high and low levels of CD8+ sTILs in their primary tumor specimen, and progression free survival and overall survival when CD8 is assessed by counting iTIL rather than sTIL

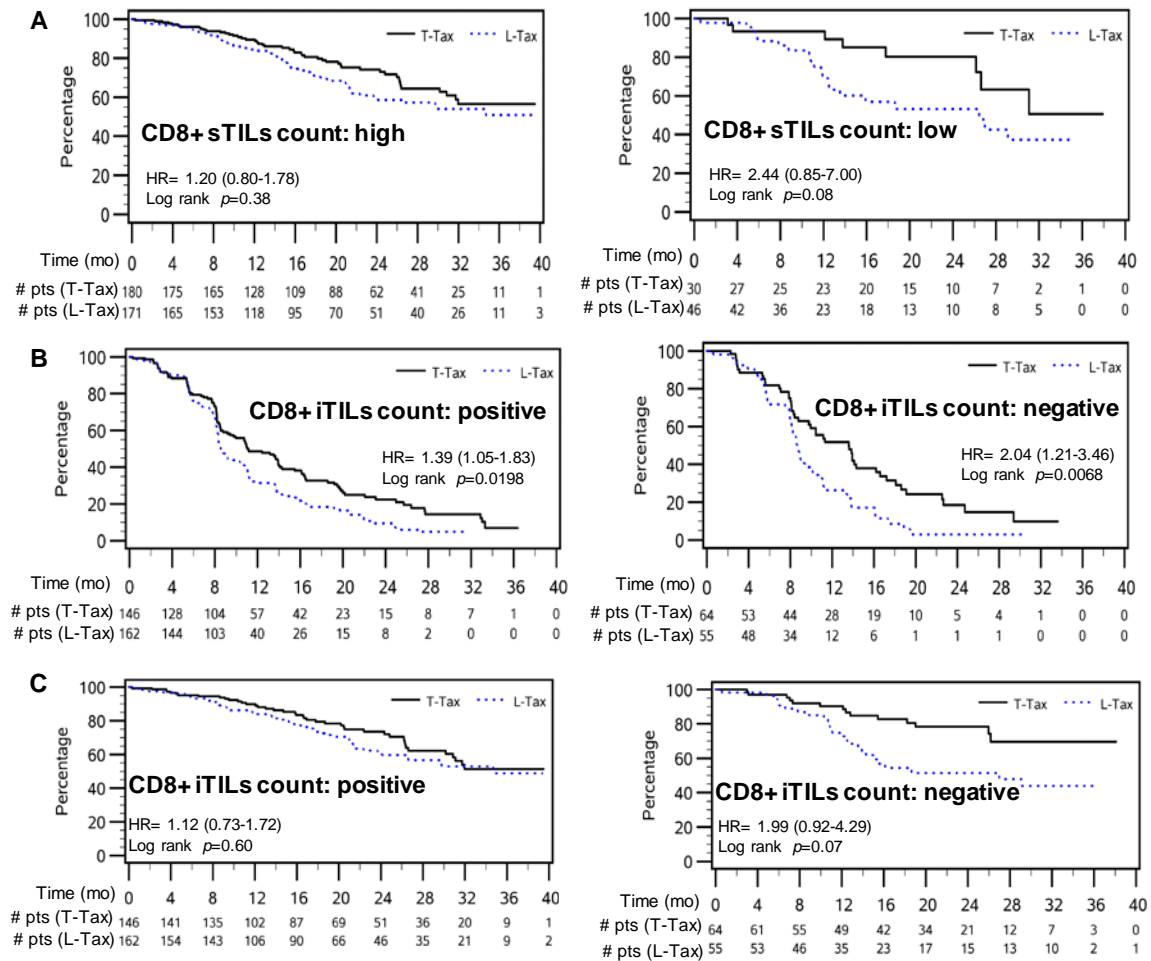

**eFigure 4.** Model of Association of Immune Infiltrates in the Primary Tumor Biopsy (CD8+ sTIL) With the CCTG MA.31 Metastatic *HER2*-Positive Population

The effect of trastuzumab vs lapatinib as first-line metastatic treatment is assessed.

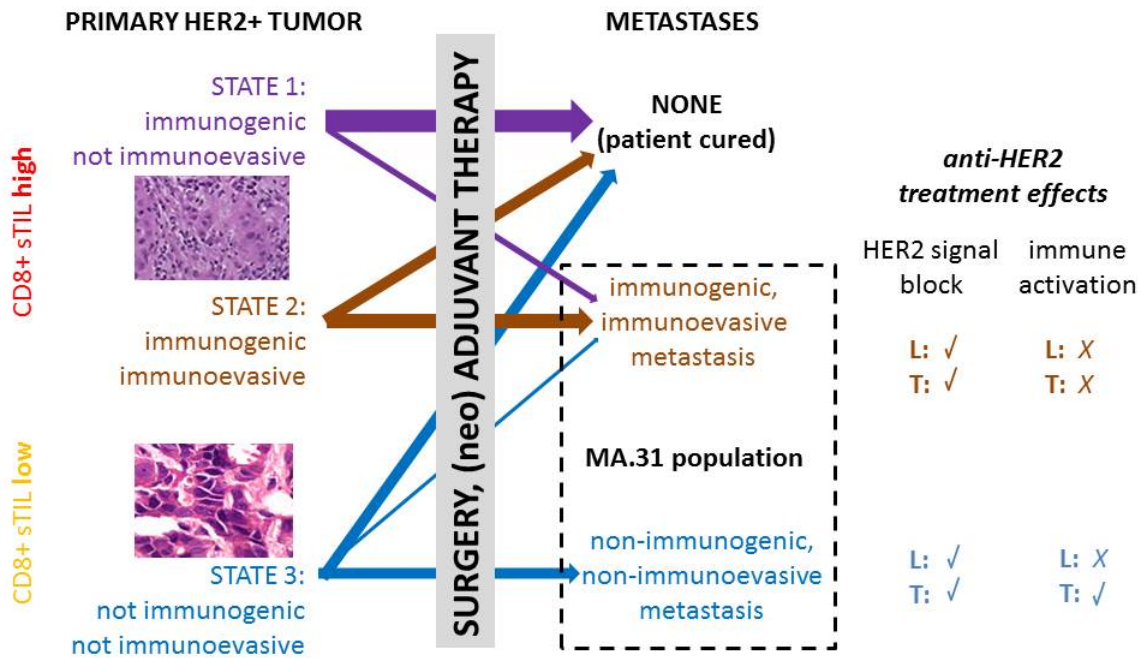

**eTable 1.** Patient Characteristics in the CCTG MA.31 Immune Biomarker Study Population

| Parameter                           |  | MA.31       | H&E         | IHC (CD8)        |
|-------------------------------------|--|-------------|-------------|------------------|
| <b>No. of Patients*</b>             |  | <b>647</b>  | <b>614</b>  | <b>427</b>       |
| <b>Age (median)</b>                 |  | <b>55.0</b> | <b>55.0</b> | <b>55.0</b>      |
| <b>Median follow-up (months)</b>    |  | <b>21.7</b> | <b>21.6</b> | <b>22.6</b>      |
| <b>HER2(+)</b>                      |  | <b>100%</b> | <b>100%</b> | <b>100%</b>      |
| ER negative                         |  | 31%         | 31%         | 31%              |
| Mets at presentation                |  | 42%         | 43%         | 43%              |
| Mets only at relapse                |  | 57%         | 57%         | 56%              |
| ECOG performance status 0           |  | 61%         | 61%         | 60%              |
| ECOG 1                              |  | 35%         | 35%         | 36%              |
| prior anthracyclines                |  | 41%         | 41%         | 41%              |
| prior taxanes                       |  | 20%         | 20%         | 17%              |
| prior anti-HER2                     |  | 18%         | 18%         | 17%              |
| paclitaxel q wk                     |  | 43%         | 44%         | 41%              |
| docetaxel q3wk                      |  | 57%         | 56%         | 59%              |
| <b>lapatinib (L-Tax)</b>            |  | <b>50%</b>  | <b>50%</b>  | <b>51%**</b>     |
| <b>trastuzumab (T-Tax)</b>          |  | <b>50%</b>  | <b>50%</b>  | <b>49%</b>       |
| <b>TIL score &gt;5%</b>             |  |             | <b>35%</b>  |                  |
| <b>CD8+ stromal TILs (sTIL) ≥ 3</b> |  |             |             | <b>82%</b>       |
| CD8+ intratumoral TILs ≥ 1          |  |             | -           | 72%              |
| FOXP3+ sTIL ≥ 3                     |  |             |             | 67%<br>(267/398) |
| CD56+ sTIL > 0                      |  |             |             | 3% (11/372)      |
| PD1+ sTIL > 0                       |  |             |             | 13%<br>(51/394)  |

\* see Figure 1 for detailed explanation of patient numbers

\*\* no significant imbalances by treatment arm for any parameter

**eTable 2.** Biomarker Expression in the CCTG MA.31 Study Population, Stratified by Disease Status

| Parameter                         | Stage IV No. | Relapsed No. | P Value (Fisher exact test) |
|-----------------------------------|--------------|--------------|-----------------------------|
| TIL score >5%                     | 94 (36%)     | 114 (34%)    | .54                         |
| CD8+ stromal TILs (sTIL) $\geq$ 3 | 155 (83%)    | 196 (81%)    | .61                         |
| CD8+ intratumoral TILs $\geq$ 1   | 140 (75%)    | 168 (70%)    | .23                         |
| FOXP3+ sTIL $\geq$ 3              | 129 (74%)    | 139 (62%)    | .01                         |
| CD56+ sTIL > 0                    | 10 (7%)      | 10 (5%)      | .48                         |
| PD1+ sTIL > 0                     | 30 (18%)     | 20 (9%)      | .009                        |

**eTable 3.** Estimates of Prognostic Hazard Ratio (HR) for High vs Low Level Immune Infiltrates in the CCTG MA.31 IHC Immune Biomarker Study Population

Analysis uses univariate analysis stratified by hormone receptor status (A and B) and by disease status (C and D)

**A. Hormone Receptor Positive (ER or PR)**

| Immune biomarker               | Stratified HR |           | P Value |
|--------------------------------|---------------|-----------|---------|
|                                | HR            | 95% CI    |         |
| CD8+ sTIL: ≥ 3 vs. < 3         | 0.84          | 0.57-1.22 | .35     |
| CD8+ iTIL: ≥ 1 vs. < 1         | 0.79          | 0.56-1.10 | .16     |
| FOXP3+ sTIL: ≥ 3 vs. < 3       | 0.78          | 0.56-1.09 | .14     |
| FOXP3+ iTIL: ≥ 1 vs. < 1       | 0.76          | 0.55-1.03 | .08     |
| PD-1+ sTIL: > 0 vs. = 0        | 0.88          | 0.53-1.45 | .61     |
| PD-1+ iTIL: > 0 vs. = 0        | 0.81          | 0.50-1.31 | .39     |
| Overall H&E sTIL: ≥ 5% vs. < 5 | 1.05          | 0.81-1.37 | .70     |

**B. Hormone Receptor Negative (ER or PR)**

| Immune biomarker               | Stratified HR |           | P Value |
|--------------------------------|---------------|-----------|---------|
|                                | HR            | 95% CI    |         |
| CD8+ sTIL: ≥ 3 vs. < 3         | 1.29          | 0.70-2.38 | .42     |
| CD8+ iTIL: ≥ 1 vs. < 1         | 1.16          | 0.39-1.96 | .57     |
| FOXP3+ sTIL: ≥ 3 vs. < 3       | 1.20          | 0.71-2.04 | .50     |
| FOXP3+ iTIL: ≥ 1 vs. < 1       | 1.08          | 0.64-1.82 | .77     |
| PD-1+ sTIL: > 0 vs. = 0        | 0.77          | 0.36-1.66 | .51     |
| PD-1+ iTIL: > 0 vs. = 0        | 1.17          | 0.60-2.32 | .64     |
| Overall H&E sTIL: ≥ 5% vs. < 5 | 0.94          | 0.63-1.40 | .78     |

**C. Relapsed**

| Immune biomarker               | Stratified HR |           | P Value |
|--------------------------------|---------------|-----------|---------|
|                                | HR            | 95% CI    |         |
| CD8+ sTIL: ≥ 3 vs. < 3         | 0.83          | 0.54-1.29 | .41     |
| CD8+ iTIL: ≥ 1 vs. < 1         | 0.95          | 0.65-1.39 | .80     |
| FOXP3+ sTIL: ≥ 3 vs. < 3       | 0.92          | 0.64-1.31 | .64     |
| FOXP3+ iTIL: ≥ 1 vs. < 1       | 0.98          | 0.69-1.38 | .90     |
| PD-1+ sTIL: > 0 vs. = 0        | 0.96          | 0.53-1.72 | .89     |
| PD-1+ iTIL: > 0 vs. = 0        | 1.14          | 0.55-2.36 | .72     |
| Overall H&E sTIL: ≥ 5% vs. < 5 | 1.20          | 0.89-1.62 | .23     |

**D. Stage IV at Diagnosis**

| Immune biomarker               | Stratified HR |           | P Value |
|--------------------------------|---------------|-----------|---------|
|                                | HR            | 95% CI    |         |
| CD8+ sTIL: ≥ 3 vs. < 3         | 1.01          | 0.64-1.61 | .96     |
| CD8+ iTIL: ≥ 1 vs. < 1         | 0.76          | 0.51-1.14 | .18     |
| FOXP3+ sTIL: ≥ 3 vs. < 3       | 0.85          | 0.57-1.28 | .44     |
| FOXP3+ iTIL: ≥ 1 vs. < 1       | 0.66          | 0.46-0.96 | .03     |
| PD-1+ sTIL: > 0 vs. = 0        | 0.83          | 0.50-1.38 | .47     |
| PD-1+ iTIL: > 0 vs. = 0        | 0.70          | 0.43-1.12 | .13     |
| Overall H&E sTIL: ≥ 5% vs. < 5 | 0.96          | 0.71-1.31 | .82     |



**eTable 4.** Exploratory Additional Stratified Full Multivariate Analysis for PFS

| Parameter                             | Hazard Ratio | 95%CI     | P Value<br>( $\chi^2$ test) |
|---------------------------------------|--------------|-----------|-----------------------------|
| Treatment: L-Tax vs T-Tax             | 2.54         | 1.42-4.53 | .002                        |
| CD8+sTILs                             | 1.28         | 0.78-2.11 | .33                         |
| <i>Interaction</i>                    | 0.53         | 0.28-0.98 | .044                        |
| Age (Continuous)                      | 0.86         | 0.67-1.11 | .25                         |
| Performance Status                    | 0.72         | 0.57-0.92 | .008                        |
| Stage IV vs relapsed                  | 1.07         | 0.81-1.42 | .64                         |
| Hormone receptor positive vs negative | 0.81         | 0.63-1.05 | .11                         |
| Weight (Continuous)                   | 1.00         | 0.99-1.01 | .96                         |

Includes the primary biomarker CD8, randomized treatment arm, age, and factors considered to be potential confounders: ECOG performance status, disease status (metastatic at presentation vs. relapse of disease that was localized at diagnosis), hormone receptor status (ER or PR positive vs. both negative) and weight
